# Supplementary material for: IRAV (FLJ11286), an Interferon-Stimulated Gene with Antiviral Activity against Dengue Virus, Interacts with MOV10
Source: PubMed Central journal article supplement (PMC5309953; doi:10.1128/jvi.01606-16), 2017-02-14
Supplement: JVI.01606-16_zjv999182364s1.pdf [file JVI.01606-16_zjv999182364s1.pdf]

**Table S1. IRAV Interaction Partners Identified by MS.**

| Number | Sequence Id | Sequence Name   | Protein Length (aa) | Peptides | % Sequence Coverage | Spectral Count |
|--------|-------------|-----------------|---------------------|----------|---------------------|----------------|
| 1      | Q9NUL5      | FLJ11286 (IRAV) | 291                 | 25       | 75.95               | 6756           |
| 2      | Q6PKG0      | LARP1           | 1096                | 56       | 60.49               | 1813           |
| 3      | Q14980      | NUMA1           | 2115                | 79       | 47.04               | 1280           |
| 4      | P43243      | MATR3           | 847                 | 35       | 46.87               | 1226           |
| 5      | Q09161      | NCBP1           | 790                 | 30       | 49.11               | 984            |
| 6      | P67809      | YBX1            | 324                 | 15       | 53.7                | 900            |
| 7      | Q14152      | EIF3A           | 1382                | 49       | 36.25               | 837            |
| 8      | Q92900      | UPF1 (RENT1)    | 1129                | 41       | 45.44               | 582            |
| 9      | P62249      | RPS16           | 146                 | 13       | 63.7                | 571            |
| 10     | Q9HCE1      | MOV10           | 1003                | 36       | 40.08               | 454            |
| 11     | P16989      | YBX3            | 372                 | 13       | 35.75               | 437            |
| 12     | Q15717      | HuR (ELAVL1)    | 326                 | 15       | 53.37               | 429            |
| 13     | P62701      | RPS4X           | 263                 | 14       | 49.05               | 424            |
| 14     | Q15149      | PLEC            | 4684                | 72       | 16.52               | 409            |
| 15     | P22626      | HNRNPA2B1       | 353                 | 17       | 50.71               | 367            |
| 16     | Q04637      | EIF4G1          | 1599                | 28       | 24.64               | 349            |
| 17     | P09651      | HNRNPA1         | 372                 | 14       | 44.89               | 325            |
| 18     | P23246      | SFPQ            | 707                 | 19       | 35.36               | 312            |
| 19     | Q9H307      | PNN             | 717                 | 14       | 22.87               | 299            |
| 20     | P52597      | HNRNPF          | 415                 | 11       | 45.54               | 269            |
| 21     | Q9Y520      | PRRC2C          | 2896                | 27       | 11.57               | 268            |
| 22     | P23588      | EIF4B           | 611                 | 17       | 32.41               | 265            |
| 23     | Q3KQU3      | MAP7D1          | 841                 | 18       | 25.21               | 247            |
| 24     | Q99613      | EIF3C           | 913                 | 10       | 14.35               | 236            |
| 25     | P15924      | DSP             | 2871                | 38       | 14.63               | 231            |
| 26     | Q9NZB2      | FAM120A         | 1118                | 17       | 19.32               | 218            |
| 27     | Q9BXP5      | SRRT            | 876                 | 16       | 25.23               | 211            |
| 28     | P49756      | RBM25           | 843                 | 17       | 28.94               | 202            |

MS analysis of IRAV interaction partners identified by Co-IP. Table is representative of MS hits ranked based on spectral count (>200).
